# Supplementary material for: Identification of favorable subgroups of childhood high-hyperdiploid acute lymphoblastic leukemia in a modern therapy era – A retrospective international study of 3,231 patients
Source: Research Square preprint supplement (doi:10.21203/rs.3.rs-8252282/v1), 2025-12-15
Supplement: Supplementary file 1 [file 00467fea2bbfb7d772942611.docx]

**Table 1: Basic demographics and outcomes of patients with HHD B-ALL and outcomes of the eight HHD B-ALL subgroups analyzed across eight multinational ALL trials**

| **all B-ALL patients** | AIEOP-BFM ALL 2009 | UKALL2003 | ALL-BFM-A 2000 | DCOG ALL10 | DCOG ALL11 | ALL-IC BFM 2009 | EORTC 58951 | COALL-03 & 09§ |
| --- | --- | --- | --- | --- | --- | --- | --- | --- |
|  |  |  |  |  |  |  |  |  |
| No. of patients | 2634 | 2225 | 450 | 621 | 678 | 2884 | 1274 | 764 |
| HHD B-ALL | 843 (32%) | 712 (32%) | 119 (26%) | 151 (24%) | 162 (24%) | 559 (20%) | 442 (35%) | 243 (32%) |
| non-HHD B-ALL | 1791 (68%) | 1513 (68%) | 331 (74%) | 470 (76%) | 516 (76%) | 2325 (80%) | 832 (65%) | 521 (68%) |
|  |  |  |  |  |  |  |  |  |
| **HHD B-ALL patients** |  |  |  |  |  |  |  |  |
|  |  |  |  |  |  |  |  |  |
| **Sex** |  |  |  |  |  |  |  |  |
| Male | 456 (54%) | 342 (48%) | 65 (55%) | 78 (52%) | 94 (58%) | 306 (55%) | 232 (52%) | 119 (49%) |
| Female | 387 (46%) | 370 (52%) | 54 (45%) | 73 (48%) | 68 (42%) | 253 (45%) | 210 (48%) | 124 (51%) |
|  |  |  |  |  |  |  |  |  |
| **Age (years)** |  |  |  |  |  |  |  |  |
| Median | 4.3 | 4.1 | 4.5 | 4.0 | 3.5 | 4.8 | 3.0 | 4.3 |
|  |  |  |  |  |  |  |  |  |
| **White blood cell count (G/L)** |  |  |  |  |  |  |  |  |
| Median | 6.8 | 7.6 | 6.7 | 6.1 | 6.6 | 6.6 | 5.7 | 7.6 |
|  |  |  |  |  |  |  |  |  |
| **NCI risk group** |  |  |  |  |  |  |  |  |
| Standard-risk | 657 (78%) | 546 (77%) | 100 (84%) | 123 (81%) | 124 (77%) | 420 (75%) | 355 (80%) | 181 (74%) |
| High-risk | 186 (22%) | 166 (23%) | 19 (16%) | 28 (19%) | 38 (23%) | 128 (23%) | 87 (20%) | 62 (26%) |
| Not reported | 0 | 0 | 0 | 0 | 0 | 11(2%) | 0 | 0 |
|  |  |  |  |  |  |  |  |  |
| **Remission status at EOI** |  |  |  |  |  |  |  |  |
| Complete remission | 825 (97.8%) | 702 (99%) | 115 (97%) | 149 (99%) | 160 (99%) | 530 (95%) | 438 (99%) | 241 (99%) |
| Induction failure | 3 (0.4%) | 10 (1%) | 4 (3%) | 2 (1%) | 1 (0.5%) | 5 (1%) | 2 (0.5%) | 2 (1%) |
| Not available | 15 (1.8%) | 0 | 0 | 0 | 1 (0.5%) | 24 (4%) | 2 (0.5%) | 0 |
|  |  |  |  |  |  |  |  |  |
| **MRD status* at EOI** |  |  |  |  |  |  |  |  |
| Negative | 327 (39%) | 364 (51%) | 33 (28%) | 41 (27%) | 45 (28%) | 202 (36%) | 338 (76%) | 47 (19%) |
| Positive | 487 (58%) | 258 (36%) | 78 (66%) | 98 (65%) | 112 (69%) | 357 (64%) | 36 (8%) | 182 (75%) |
| Not available | 29 (3%) | 90 (13%) | 8 (6%) | 12 (8%) | 5 (3%) | 0 | 68 (15%) | 14 (6%) |
|  |  |  |  |  |  |  |  |  |
| **Outcome** |  |  |  |  |  |  |  |  |
| 5-year EFS | 90.2 (87.9-92.0) | 91.6 (89.3-93.5) | 86.3 (78.6-91.4) | 88.1 (83.0-93.2) | 91.3 (86.6-96.0) | 79.1 (74.9-82.7) | 90.4 (87.1-92.9) | 85.8 (80.7-89.6) |
| 5-year OS | 96.7 (95.3-97.8) | 95.6 (93.8-96.9) | 92.2 (85.6-95.9) | 94.0 (90.3-97.7) | 96.8 (94.1-99.5) | 88.3 (84.8-91.1) | 96.0 (93.7-97.5) | 96.3 (92.9-98.0) |
| 5-year CIR | 7.7 (5.9-9.5) | 5.4 (3.9-7.4) | 11.2 (5.4-17.0) | 9.4 (4.7-14.1) | 6.2 (1.9-10.5) | 16.2 (12.7-19.8) | 8.2 (5.8-11.2) | 11.7 (7.6-15.8) |
|  |  |  |  |  |  |  |  |  |
| **Follow-up (years)** |  |  |  |  |  |  |  |  |
| Median | 8.1 | 11,3 | 7.9 | 9.8 | 5.8 | 4.6 | 6.7 | 8.6 |
|  |  |  |  |  |  |  |  |  |
| **No. of patients with DT** | 541 | 386 | 48 | 91 | 101 | 167 | 203 | 132 |
| Proportion of B-ALL | 21% | 17% | 11% | 15% | 15% | 6% | 16% | 17% |
| 5-year EFS | 93.4 (90.9-95.2) | 92.9 (89.9-95.1) | 87.4 (74.0-94.1) | 94.5 (89,8-99.2) | 93.1 (87.6-98.6) | 81.8 (73.7-87.5) | 96.5 (92.7-98.3) | 86.9 (79.8-91.7) |
| 5-year OS | 97.9 (96.3-98.9) | 95.8 (93.3-97.4) | 93.6 (81.3-97.9) | 95.6 (91.5-99.7) | 97.0 (93.7-100) | 90.1 (83.1-94.2) | 98.0 (94.6-99.2) | 96.2 (91.1-98.4) |
| 5-year CIR | 5.0 (3.1-6.8) | 3.8 (2.3-6.3) | 10.6 (1.7-19.4) | 2.2 (0.9-5.3) | 3.9 (0.6-8.4) | 12.8 (6.7-18.8) | 3.5 (1.6-6.8) | 10.0 (4.8-15.2) |
|  |  |  |  |  |  |  |  |  |
| **No. of patients with TT** | 419 | 292 | 38 | 70 | 81 | 108 | 136 | 88 |
| Proportion of B-ALL | 16% | 13% | 8% | 11% | 12% | 4% | 11% | 12% |
| 5-year EFS | 93.4 (90.5-95.4) | 93.1 (89.5-95.5) | 89.3 (73.8-95.8) | 95.7 (91.0-100) | 91.3 (84.4-98.2) | 80.1 (69.6-87.4) | 96.9 (92.0-98.8) | 93.1 (85.4-96.9) |
| 5-year OS | 97.6 (95.5-98.7) | 96.2 (93.3-97.9) | 94.4 (79.5-98.6) | 97.1 (93.2-100) | 96.3 (92.2-100) | 86.4 (76.0-92.5) | 98.5 (94.2-99.6) | 98.9 (92.2-99.8) |
| 5-year CIR | 4.7 (2.6-6.7) | 2.9 (1.4-5.6) | 10.7 (0.7-20.8) | 1.4 (1.3-4.1) | 0.5 (0.05-10.5) | 14.7 (6.7-22.7) | 3.1 (1.0-7.2) | 5.7 (0.8-10.6) |
|  |  |  |  |  |  |  |  |  |
| **No. of patients with T18** | 642 | 510 | 84 | 108 | 144 | 240 | 282 | 149 |
| Proportion of B-ALL | 24% | 23% | 19% | 17% | 21% | 8% | 22% | 20% |
| 5-year EFS | 92.3 (89.9-94.1) | 93.1 (89.5-95.5) | 85.3 (75.5-91.4) | 91.7 (86.4-97.0) | 91.0 (85.9-96.1) | 80.3 (73.7-85.4) | 92.1 (88.1-94.8) | 89.7 (83.6-93.7) |
| 5-year OS | 97.3 (95.7-98.3) | 96.2 (93.3-97.9) | 92.5 (84.1-96.6) | 96.3 (92.8-99.8) | 96.4 (93.3-99.5) | 90.5 (5.4-93.9) | 97.0 (94.1-98.5) | 98.0 (93.9-99.3) |
| 5-year CIR | 5.8 (4.0-7.6) | 2.9 (1.4-5.6) | 12.3 (5.1-19.6) | 6.5 (1.8-11.2) | 6.3 (1.8-10.8) | 14.8 (9.5-20.1) | 6.9 (4.2-10.4) | 8.2 (3.7-12.7) |
|  |  |  |  |  |  |  |  |  |
| **No. of patients with UK-GR** | 696 | 568 | 86 | 122 | 140 | 258 | 288 | 174 |
| Proportion of B-ALL | 26% | 26% | 19% | 19% | 21% | 9% | 23% | 23% |
| 5-year EFS | 91.0 (88.6-92.9) | 93.5 (91.1-95.2) | 86.8 (77.4-92.5) | 91.0 (85.9-96.1) | 91.7 (86.6-96.8) | 80.5 (74.2-85.4) | 90.5 (86.4-93.4) | 87.8 (81.9-91.8) |
| 5-year OS | 96.9 (95.3-98.0) | 97.0 (95.2-98.1) | 94.0 (86.1-97.5) | 95.9 (92.4-99.4) | 96.3 (93.2-99.4) | 89.9 (85.0-93.3) | 95.3 (92.1-97.3) | 97.7 (94.0-99.1) |
| 5-year CIR | 6.8 (4.9-8.7) | 3.6 (2.4-5.6) | 10.8 (4.1-17.6) | 6.7 (2.2-11.2) | 5.5 (1.2-9.8) | 14.5 (9.4-19.6) | 8.1 (5.2-11.8) | 9.9 (5.4-14.4) |
|  |  |  |  |  |  |  |  |  |
| **No. of patients with MCN 54-67** | 705 | 586 | 98 | 126 | 134 | 464 | 356 | 207 |
| Proportion of B-ALL | 27% | 26% | 22% | 20% | 20% | 16% | 28% | 27% |
| 5-year EFS | 91.4 (89.0-93.3) | 92.2 (89.8-94.1) | 86.3 (77.6-91.8) | 91.3 (86.4-96.2) | 92.2 (87.3-97.1) | 80.5 (75.9-84.3) | 92.8 (89.4-95.1) | 88.7 (83.5-92.4) |
| 5-year OS | 97.0 (95.4-98.0) | 95.5 (93.5-96.9) | 92.6 (85.0-96.4) | 96.0 (92.7-99.3) | 96.1 (92.8-99.4) | 90.5 (86.8-93.2) | 98.0 (95.8-99.0) | 96.6 (93.0-98.4) |
| 5-year CIR | 6.6 (4.7-8.5) | 4.6 (3.2-6.7) | 11.6 (5.1-18.1) | 6.4 (3.7-5.0) | 4.8 (0.7-8.9) | 15.2 (11.4-19.0) | 6.1 (3.8-9.0) | 9.3 (5.3-13.3) |
|  |  |  |  |  |  |  |  |  |
| **No. of pts. with MCN 51-53** | 138 | 126 | 21 | 25 | 28 | 95 | 86 | 36 |
| Proportion of B-ALL | 5% | 6% | 5% | 4% | 4% | 3% | 7% | 5% |
| 5-year EFS | 83.9 (76.6-89.1) | 88.9 (81.9-93.3) | 85.7 (62.0-95.2) | 72.0 (54.4-89.6) | 87.3 (73.6-100) | 72.6 (61.9-80.8) | 80.5 (70.1-87.6) | 68.7 (50.6-81.3) |
| 5-year OS | 95.6 (90.6-98.0) | 96.0 (90.7-98.3) | 90.5 (67.0-97.5) | 84.0 (69.7-98.3) | 100 | 77.8 (66.8-85.5) | 88.0 (78.8-93.4) | 94.3 (79.0-98.5) |
| 5-year CIR | 13.2 (7.5-18.9) | 9.0 (5.0-15.6) | 9.5 (0.0-22.4) | 25 (7.8-42.2) | 12.7 (1.0-26.4) | 20.8 (12.2-29.5) | 17.1 (9.8-26.1) | 25.7 (11.0-40.4) |
|  |  |  |  |  |  |  |  |  |
| **No. of pts. with MCN 54-55** | 280 | 230 | 46 | 44 | 54 | 176 | 141 | 82 |
| Proportion of B-ALL | 11% | 10% | 10% | 7% | 8% | 6% | 11% | 11% |
| 5-year EFS | 90.1 (86.0-93.1) | 93.8 (89.8-96.3) | 84.2 (69.6-92.2) | 95.5 (89.4-100) | 93.9 (87.2-100) | 82.5 (75.1-87.8) | 93.8 (87.9-96.9) | 85.2 (75.5-91.3) |
| 5-year OS | 97.1 (94.2-98.5) | 95.6 (92.0-97.6) | 93.1 (80.1-97.7) | 95.5 (89.4-100) | 96.3 (91.2-100) | 90.2 (83.4-94.3) | 99.2 (94.3-99.9) | 96.3 (89.0-98.8) |
| 5-year CIR | 8.4 (5.1-11.7) | 3.2 (1.5-6.6) | 13.6 (3.3-23.9) | 4.5 (1.6-10.6) | 2.3 (2.2-6.8) | 15.2 (9.2-21.2) | 6.2 (2.9-11.3) | 13.5 (6.1-21.0) |
|  |  |  |  |  |  |  |  |  |
| **No. of pts. with MCN 56-67** | 424 | 356 | 52 | 82 | 80 | 288 | 215 | 125 |
| Proportion of B-ALL | 16% | 16% | 12% | 13% | 12% | 10% | 17% | 16% |
| 5-year EFS | 92.2 (89.2-94.4) | 91.2 (87.8-93.8) | 88.3 (75.7-94.6) | 89.0 (82.1-95.9) | 91.0 (83.9-98.1) | 79.4 (73.1-84.3) | 92.1 (87.4-95.1) | 91.0 (84.4-94.9) |
| 5-year OS | 96.9 (94.7-98.2) | 95.5 (92.7-97.2) | 92.1 (80.2-97.0) | 96.3 (92.2-100) | 95.9 (91.4-100) | 90.7 (85.8-93.9) | 97.2 (93.8-98.7) | 96.8 (91.7-98.8) |
| 5-year CIR | 5.4 (3.2-7.6) | 5.5 (3.6-8.5) | 9.8 (1.5-18.0) | 7.4 (1.7-13.1) | 6.6 (0.3-12.9) | 15.2 (10.2-20.1) | 6.0 (3.3-9.9) | 6.5 (2.1-11.0) |
|  |  |  |  |  |  |  |  |  |
|  |  |  |  |  |  |  |  |  |
|  |  |  |  |  |  |  |  |  |

**Abbreviations:** HHD, high-hyperdiploid; ALL, acute lymphoblastic leukemia; No., number; EOI, end-of-induction; EFS, event-free survival; OS, overall survival; CIR, cumulative incidence of relapse; DT, double trisomy; TT, triple trisomy; T18, trisomy 18; UK-GR, United Kingdom-good risk; MCN, modal chromosome number, pts., patients.

* The definition (level, method used) of MRD-positivity and -negativity at end-of-induction was protocol-based and not consistent between the eight trials.

§ COALL-03 & 09 is an abbreviation for the combined COALL 07-03 and 08-09 trials

**Notes:** All outcome measures (EFS, OS; CIR) are displayed with 95% confidence intervals in brackets.
