# Supplementary material for: Identification of favorable subgroups of childhood high-hyperdiploid acute lymphoblastic leukemia in a modern therapy era – A retrospective international study of 3,231 patients
Source: Research Square preprint supplement (doi:10.21203/rs.3.rs-8252282/v1), 2025-12-15
Supplement: Supplementary file 1 [file 4046d154ca8a7072a2ed513b.pdf]

**Table S1: Study groups and treatment protocols**

| <b>Study Group</b>          | <b>Treatment protocol</b> | <b>Period</b> |
|-----------------------------|---------------------------|---------------|
| AIEOP-BFM ALL Study Group   | AIEOP-BFM ALL 2009        | 2010 – 2017   |
| ALL-BFM-Austria Study Group | ALL-BFM-A 2000            | 1999 – 2009   |
| DCOG                        | DCOG ALL10                | 2004 – 2012   |
|                             | DCOG ALL11                | 2012 – 2020   |
| ALL-IC BFM Study Group      | ALL-IC BFM 2009           | 2010 – 2018   |
| MRC UKALL                   | UKALL2003                 | 2003 – 2011   |
| EORTC-CLG                   | EORTC-CLG 58951           | 1998 – 2008   |
| COALL Study Group           | COALL 07-03               | 2003 – 2010   |
|                             | COALL 08-09               | 2010 – 2016   |

**Abbreviations:** ALL, acute lymphoblastic leukemia; AIEOP-BFM, Associazione Italiana Ematologia e Oncologia Pediatrica (AIEOP) – Berlin-Frankfurt-Münster ALL Study Group; DCOG, Dutch Childhood Oncology Group; ALL-IC (Intercontinental) BFM Study Group; MRC UKALL, Medical Research Council United Kingdom ALL; EORTC-CLG, European Organization for Research and Treatment of Cancer – Children’s Leukemia Group; COALL, Cooperative Study Group for ALL.

**Table S2: Number of patients with B-ALL overall, HHD B-ALL and non-HDD B-ALL across the eight trials**

| <b>Treatment protocol</b> | <b>No. of HHD B-ALL pts.</b> | <b>No. of non-HHD B-ALL pts.</b> | <b>all pts.</b> |
|---------------------------|------------------------------|----------------------------------|-----------------|
| AIEOP-BFM ALL 2009*       | 843                          | 1791                             | 2634            |
| ALL-BFM-A 2000            | 119                          | 331                              | 450             |
| DCOG ALL10                | 151                          | 470                              | 621             |
| DCOG ALL11                | 162                          | 516                              | 678             |
| ALL-IC BFM 2009           | 559                          | 2325                             | 2884            |
| UKALL2003                 | 712                          | 1513                             | 2225            |
| EORTC-CLG 58951           | 442                          | 832                              | 1274            |
| COALL 07-03 & 08-09       | 243                          | 521                              | 764             |
|                           | 3231                         | 8299                             | 11530           |

**Abbreviations:** HHD, hyperdiploid; ALL, acute lymphoblastic leukemia; No., number, pts., patients.

\* without AIEOP ALL patients for whom no conventional karyotypes were available.

**Table S3: 5-year event-free survival rates of the HHD B-ALL according to MCN 54–67 and UK-profile across the eight trials**

**AIEOP-BFM ALL 2009**

|                                 | N   | %    | EFS  | CI<br>95%<br>LL | CI<br>95%<br>UL |
|---------------------------------|-----|------|------|-----------------|-----------------|
| <b>MCN / UK-profile</b>         |     |      |      |                 |                 |
| <b>MCN &lt;54 &amp; UK poor</b> | 45  | 5.3  | 73.1 | 57.5            | 83.7            |
| <b>MCN &lt;54 &amp; UK good</b> | 93  | 11.0 | 89.1 | 80.7            | 94.0            |
| <b>MCN 54-67 &amp; UK poor</b>  | 102 | 12.1 | 91.9 | 84.5            | 95.9            |
| <b>MCN 54-67 &amp; UK good</b>  | 603 | 71.5 | 91.3 | 88.7            | 93.3            |

**ALL-BFM-A 2000**

|                                 | N  | %    | EFS  | CI<br>95%<br>LL | CI<br>95%<br>UL |
|---------------------------------|----|------|------|-----------------|-----------------|
| <b>MCN / UK-profile</b>         |    |      |      |                 |                 |
| <b>MCN &lt;54 &amp; UK poor</b> | 6  | 5.0  | 83.3 | 27.3            | 97.5            |
| <b>MCN &lt;54 &amp; UK good</b> | 15 | 12.6 | 86.7 | 56.4            | 96.5            |
| <b>MCN 54-67 &amp; UK poor</b>  | 27 | 22.7 | 78.6 | 54.6            | 90.9            |
| <b>MCN 54-67 &amp; UK good</b>  | 71 | 59.7 | 86.8 | 76.1            | 92.9            |

**DCOG ALL10**

|                                 | N   | %    | EFS  | CI<br>95%<br>LL | CI<br>95%<br>UL |
|---------------------------------|-----|------|------|-----------------|-----------------|
| <b>MCN / UK-profile</b>         |     |      |      |                 |                 |
| <b>MCN &lt;54 &amp; UK poor</b> | 12  | 7.9  | 58.3 | 30.5            | 86.1            |
| <b>MCN &lt;54 &amp; UK good</b> | 13  | 8.6  | 84.6 | 65.0            | 100.0           |
| <b>MCN 54-67 &amp; UK poor</b>  | 17  | 11.3 | 88.2 | 72.9            | 100.0           |
| <b>MCN 54-67 &amp; UK good</b>  | 109 | 72.2 | 91.7 | 86.6            | 96.8            |

## DCOG ALL11

|                     | N   | %    | EFS  | CI<br>95%<br>LL | CI<br>95%<br>UL |
|---------------------|-----|------|------|-----------------|-----------------|
| MCN / UK-profile    |     |      |      |                 |                 |
| MCN <54 & UK poor   | 12  | 7.4  | 90.9 | 73.8            | 100.0           |
| MCN <54 & UK good   | 16  | 9.9  | 85.2 | 66.0            | 100.0           |
| MCN 54-67 & UK poor | 10  | 6.2  | 90.0 | 71.4            | 100.0           |
| MCN 54-67 & UK good | 124 | 76.5 | 92.6 | 87.5            | 97.7            |

## ALL-IC BFM 2009

|                     | N   | %    | EFS  | CI<br>95%<br>LL | CI<br>95%<br>UL |
|---------------------|-----|------|------|-----------------|-----------------|
| MCN / UK-profile    |     |      |      |                 |                 |
| MCN <54 & UK poor   | 67  | 11.5 | 69.3 | 55.6            | 79.5            |
| MCN <54 & UK good   | 40  | 6.9  | 76.7 | 59.9            | 87.1            |
| MCN 54-67 & UK poor | 255 | 43.8 | 80.4 | 74.2            | 85.2            |
| MCN 54-67 & UK good | 220 | 37.8 | 83.6 | 77.6            | 88.1            |

## UKALL2003

|                     | N   | %    | EFS  | CI<br>95%<br>LL | CI<br>95%<br>UL |
|---------------------|-----|------|------|-----------------|-----------------|
| MCN / UK-profile    |     |      |      |                 |                 |
| MCN <54 & UK poor   | 51  | 7.2  | 86.2 | 73.2            | 93.2            |
| MCN <54 & UK good   | 75  | 10.5 | 90.7 | 81.4            | 95.4            |
| MCN 54-67 & UK poor | 93  | 13.1 | 83.6 | 74.3            | 89.8            |
| MCN 54-67 & UK good | 493 | 69.2 | 93.3 | 91.3            | 95.7            |

### **EORTC-CLG 58951**

|                                 | N   | %    | EFS  | CI<br>95%<br>LL | CI<br>95%<br>UL |
|---------------------------------|-----|------|------|-----------------|-----------------|
| <b>MCN / UK-profile</b>         |     |      |      |                 |                 |
| <b>MCN &lt;54 &amp; UK poor</b> | 35  | 7.9  | 88.0 | 71.2            | 95.3            |
| <b>MCN &lt;54 &amp; UK good</b> | 51  | 11.5 | 75.1 | 60.2            | 85.1            |
| <b>MCN 54-67 &amp; UK poor</b>  | 119 | 26.9 | 90.9 | 83.7            | 95.0            |
| <b>MCN 54-67 &amp; UK good</b>  | 237 | 53.6 | 93.8 | 89.8            | 96.3            |

### **COALL 07-03 & 08-09**

|                                 | N   | %    | EFS  | CI<br>95%<br>LL | CI<br>95%<br>UL |
|---------------------------------|-----|------|------|-----------------|-----------------|
| <b>MCN / UK-profile</b>         |     |      |      |                 |                 |
| <b>MCN &lt;54 &amp; UK poor</b> | 16  | 6.6  | 68.8 | 40.5            | 85.6            |
| <b>MCN &lt;54 &amp; UK good</b> | 20  | 8.2  | 68.6 | 43.0            | 84.5            |
| <b>MCN 54-67 &amp; UK poor</b>  | 53  | 21.8 | 84.6 | 71.5            | 92.0            |
| <b>MCN 54-67 &amp; UK good</b>  | 154 | 63.4 | 90.2 | 84.2            | 93.9            |

**Abbreviations:** N, number; EFS, event-free survival; CI, confidence interval; LL, lower limit; UL, upper limit; MCN, modal chromosome number; UK, United Kingdom; GR, good-risk; PR, poor-risk

**Table S4 Stepwise statistical analysis applied for final ranking of the HHD B-ALL subtypes across the eight trials**

- 1- In each analysed cohort, the subtypes were ranked based on their outcome (1 is the best and 8 is the worst).
- 2- For each HHD B-ALL subtype, the difference of outcome compared to the best performing subtype ( $\Delta$  diff.) was calculated.
- 3- Weighting (multiply) of the HHD B-ALL subtype ranking was done by the corresponding difference (rank+).
- 4- Steps 1 to 3 were repeated for EFS, OS and CIR.
- 5- The weighted rankings of all three endpoints ( $EFS_{rank+} + OS_{rank+} + CIR_{rank+}$ ) were added.
- 6- For each trial, the proportion of HHD B-ALL patients who harbor that subgroup ( $Rank_{p\ HHD}$ ) were calculated and ranked.
- 7- For each trial, the proportion of B-ALL patients who harbor that subgroup ( $Rank_{p\ Total}$ ) were calculated and ranked.
- 8- For each subgroup within the analysed cohorts, the final ranking was calculated by weighting (multiplying) its corresponding ( $EFS_{rank+} + OS_{rank+} + CIR_{rank+}$ ) \*  $Rank_{p\ HHD}$  \*  $Rank_{p\ Total}$

## Aims

High-hyperdiploidy, the largest and favorable subtype of childhood ALL, exhibits significant biological and prognostic heterogeneity. To establish outcome of patients treated on European-based ALL protocols, according to eight different definitions of “low-risk” high-hyperdiploidy: **a)** modal chromosome number 51-67 with 4 subcategories; **b)** United Kingdom ALL low-risk high-hyperdiploid group; **c)** single trisomy of chromosome 18; **d)** double trisomy of chromosomes 4 and 10; **e)** and triple trisomy of chromosomes 4, 10, and 17. Outcome data will serve as reference bench mark (landmark paper) for ongoing and future high-hyperdiploid ALL cohorts defined by more modern methods such as SNP arrays and treatment with the most contemporary therapy protocols.

## Study population

- Completed trials where the major recruitment period was between January 1, 1998 and December 31, 2020. For example, a trial running from 1999 to 2006 is acceptable but not one running 1994 to 2001.
- Patients 1 to 18 years with **non-Down syndrome** B-ALL.
- Availability of “only” basic data on the whole reported cohort: sex (ratio of male to female), age (median and ranges), WBC counts (median and ranges), NCI group (ratio of SR vs. HR)
- Availability of 5-year event-free survival (EFS) and overall survival rates (OS) as well as cumulative incidence of relapse (CIR) of the eight categories as outlined below.
- Availability of median follow-up (and ranges) of surviving patients (at least five years)

## Definitions

High-hyperdiploidy is defined as a chromosome number of 51-67 inclusive (Chr. 51-67). Diagnostic pretreatment bone marrow and/or peripheral blood samples should have been analyzed **by standard G-banded karyotyping methods**. FISH to confirm uncertain losses or gains of chromosomes is acceptable, but should not have been the sole method for detecting high-hyperdiploidy. Patients diagnosed only by DNA index, SNP arrays and other methods are excluded from the present study!

Patients with concomitant *BCR::ABL1*, *ETV6::RUNX1*, or *TCF3::PBX1* fusions (as proven by molecular-genetic methods) or rearranged *KMT2A* should be excluded from the high-hyperdiploid group, as they are regarded as the primary genetic abnormality with prognostic and therapeutic impact potentially overriding the beneficial effect of the high-hyperdiploidy.

All karyotypes should have been curated to exclude masked haploidy / hypodiploidy from the high-hyperdiploid cohort either by molecular testing (e.g. SNP array) or by the pattern of tetrasomies (see Charrin et al. Blood. 2004 Oct 15; 104(8): 2444-51)

Incomplete karyotypes where only a chromosome count was possible or where the analysis was sub-standard and resulting in an excessive number of chromosomes (e.g. three or more) being labelled marker chromosomes should also be excluded. **In addition, if “only” a range of the modal chromosome number is reported, please take the highest value.**

For the analysis below, the “other non-HHD B-ALL” cases should only comprise cases where successful cytogenetic analysis was possible. So failed karyotypes (no abnormal cells or fewer than 20 normal metaphases) should be excluded.

Karyotypes will need to be classified into the following high-hyperdiploid subgroups:

- (1) Triple trisomy (TT), defined by simultaneous trisomy of chromosomes 4, 10 and 17
- (2) Double trisomy (DT), defined by simultaneous trisomy of 4 and 10
- (3) Trisomy 18
- (4) UKALL low-risk high hyperdiploid (UK-ALL) defined as (a) simultaneous gain of chromosome 17 and 18 or (b) the gain of chromosome 17 or 18 but no gain of chromosome 5 or 20
- (5) MCN: 51-53
- (6) MCN: 54-55
- (7) MCN: 56-67
- (8) MCN: 54-67

#### **Statistical definitions and methods**

Survival analysis – please use the Kaplan-Meier method to estimate survival probabilities (as per the definitions below) and the log-rank test to compare differences.

Event-free survival (EFS), defined as time from diagnosis (or treatment start) to relapse, second malignant neoplasm or death, censoring at date of last contact.

Overall survival (OS), defined as time from diagnosis (or treatment start) to death, censoring at date of last contact.

Cumulative Incidence of relapse (CIR) is calculated using cumulative incidence functions for competing events constructed by the method of Kalbfleisch and Prentice and compared with Gray’s test.

Please use Chi-squared test to compare proportions and the Kruskal-Wallis test to compare the equality of medians.



i-BFM Collaborative Acute lymphoblastic leukemia Project proposal  
**Outcome of high-hyperdiploid ALL (as assessed by conventional methods) in a modern therapy era**  
*Responsible Scientists: Andishe Attarbaschi & Anthony Moormann*  
*Final Analysis Plan Version 1.0, 29.09.2024*

**DATASET FORMAT**

Please, send us the results in an EXCEL spreadsheet

**Cohort description** – Please provide the following data table for **EACH** trial submitted.

|                                            |                     | HHD cases<br>(n) | Other non-HHD<br>B-ALL cases<br>(n) | P-value<br>HHD vs. other<br>B-ALL |
|--------------------------------------------|---------------------|------------------|-------------------------------------|-----------------------------------|
| Number of cases                            |                     |                  |                                     |                                   |
| Sex                                        | Male                |                  |                                     |                                   |
|                                            | Female              |                  |                                     |                                   |
| Age                                        | Median              |                  |                                     |                                   |
|                                            | Interquartile Range |                  |                                     |                                   |
|                                            | 1 – 9 years         |                  |                                     |                                   |
|                                            | 10 – 15 years       |                  |                                     |                                   |
|                                            | 16 – 18 years       |                  |                                     |                                   |
| WBC                                        | Median              |                  |                                     |                                   |
|                                            | Interquartile Range |                  |                                     |                                   |
|                                            | <10.0 G/L           |                  |                                     |                                   |
|                                            | ≥10.0 – <50.0 G/L   |                  |                                     |                                   |
|                                            | ≥50.0 – <100.0 G/L  |                  |                                     |                                   |
|                                            | ≥100.0 G/L          |                  |                                     |                                   |
| NCI Risk group                             | SR                  |                  |                                     |                                   |
|                                            | HR                  |                  |                                     |                                   |
| MRD at EOI                                 | Negative            |                  |                                     |                                   |
|                                            | Positive            |                  |                                     |                                   |
|                                            | Unknown             |                  |                                     |                                   |
| Induction failure                          | No                  |                  |                                     |                                   |
|                                            | Yes                 |                  |                                     |                                   |
|                                            | Unknown             |                  |                                     |                                   |
| Event-free survival at 5 years             |                     |                  |                                     |                                   |
| 95% CI                                     |                     |                  |                                     |                                   |
| Overall survival at 5 years                |                     |                  |                                     |                                   |
| 95% CI                                     |                     |                  |                                     |                                   |
| Cumulative incidence of relapse at 5 years |                     |                  |                                     |                                   |
| 95% CI                                     |                     |                  |                                     |                                   |
| Median follow-up time (years)              |                     |                  |                                     |                                   |
| Interquartile range                        |                     |                  |                                     |                                   |

i-BFM Collaborative Acute lymphoblastic leukemia Project proposal  
**Outcome of high-hyperdiploid ALL (as assessed by conventional methods) in a modern therapy era**  
*Responsible Scientists: Andishe Attarbaschi & Anthony Moormann*  
*Final Analysis Plan Version 1.0, 29.09.2024*

**High-hyperdiploid subgroup data**

Please provide the following data table for **EACH of the 8 subgroups** listed above:

|                                            |                     | Subgroup | Other HHD<br>B-ALL cases | P-value<br>Subgroup vs.<br>other HHD<br>B-ALL cases | Other non-<br>HHD B-ALL<br>cases | P-value<br>Subgroup vs.<br>other non-<br>HHD B-ALL<br>cases |
|--------------------------------------------|---------------------|----------|--------------------------|-----------------------------------------------------|----------------------------------|-------------------------------------------------------------|
| Number of cases                            |                     |          |                          |                                                     |                                  |                                                             |
| Sex                                        | Male                |          |                          |                                                     |                                  |                                                             |
|                                            | Female              |          |                          |                                                     |                                  |                                                             |
| Age                                        | Median              |          |                          |                                                     |                                  |                                                             |
|                                            | Interquartile Range |          |                          |                                                     |                                  |                                                             |
|                                            | 1 – 9 years         |          |                          |                                                     |                                  |                                                             |
|                                            | 10 – 15 years       |          |                          |                                                     |                                  |                                                             |
|                                            | 16 – 18 years       |          |                          |                                                     |                                  |                                                             |
| WBC                                        | Median              |          |                          |                                                     |                                  |                                                             |
|                                            | Interquartile Range |          |                          |                                                     |                                  |                                                             |
|                                            | <10.0 G/L           |          |                          |                                                     |                                  |                                                             |
|                                            | ≥10.0 – <50.0 G/L   |          |                          |                                                     |                                  |                                                             |
|                                            | ≥50.0 – <100.0 G/L  |          |                          |                                                     |                                  |                                                             |
|                                            | ≥100.0 G/L          |          |                          |                                                     |                                  |                                                             |
| NCI Risk group                             | SR                  |          |                          |                                                     |                                  |                                                             |
|                                            | HR                  |          |                          |                                                     |                                  |                                                             |
| MRD at EOI                                 | Negative            |          |                          |                                                     |                                  |                                                             |
|                                            | Positive            |          |                          |                                                     |                                  |                                                             |
|                                            | Unknown             |          |                          |                                                     |                                  |                                                             |
| Induction failure                          | No                  |          |                          |                                                     |                                  |                                                             |
|                                            | Yes                 |          |                          |                                                     |                                  |                                                             |
|                                            | Unknown             |          |                          |                                                     |                                  |                                                             |
| Event-free survival at 5 years             |                     |          |                          |                                                     |                                  |                                                             |
| 95% CI                                     |                     |          |                          |                                                     |                                  |                                                             |
| Overall survival at 5 years                |                     |          |                          |                                                     |                                  |                                                             |
| 95% CI                                     |                     |          |                          |                                                     |                                  |                                                             |
| Cumulative incidence of relapse at 5 years |                     |          |                          |                                                     |                                  |                                                             |
| 95% CI                                     |                     |          |                          |                                                     |                                  |                                                             |
